# Supplementary material for: Integrated Multi-Omics Analysis for Inferring Molecular Players in Inclusion Body Myositis
Source: MDPI journal article supplement (doi:10.3390/antiox12081639), 2023-08-19
Supplement: s1 [file s1]

**Table S1.** Biomarker performance values for target molecules

| Target molecule                         | AUC $\pm$ SD  | p-value | Sensitivity | Specificity | Index |
|-----------------------------------------|---------------|---------|-------------|-------------|-------|
| A $\beta$ 1-42                          | 0.8 $\pm$ 0.1 | 0.12    | 66.7%       | 50.0%       | 61.5% |
| Orotic acid                             | 0.9 $\pm$ 0.1 | 0.01    | 100.0%      | 83.3%       | 91.7% |
| 2-Hydroxyglutaric acid                  | 0.8 $\pm$ 0.1 | 0.01    | 72.7%       | 77.8%       | 75.0% |
| L-pyroglutamic acid (fibroblasts)       | 0.8 $\pm$ 0.1 | 0.04    | 72.7%       | 80.0%       | 76.2% |
| L-pyroglutamic acid (urine)             | 0.6 $\pm$ 0.2 | 0.42    | 50.0%       | 83.3%       | 66.7% |
| Orotidine                               | 0.9 $\pm$ 0.1 | 0.02    | 66.7%       | 83.3%       | 75.0% |
| Pseudouridina                           | 0.9 $\pm$ 0.1 | 0.01    | 83.3%       | 83.3%       | 83.3% |
| Glutathione                             | 0.7 $\pm$ 0.1 | 0.05    | 66.7%       | 75.0%       | 70.8% |
| L-pyroglutamic (urine) +<br>orotic acid |               |         | 100%        | 100%        | 100%  |

Abbreviations: AUC: area under the Receiver Operating Characteristic (ROC) curve; SD: standard deviation; Index: mean of the sensitivity and specificity.

**Table S2.** Differentially expressed genes (DEGs) involved in metabolism (extracted from Mitocarta 3.0) from RNA seq in muscle of inclusion boy myositis (IBM) patients (n=5) vs controls (CTL) (n=6).

| Gene ID  | Gene name                                                             | log2<br>Fold<br>change | p-value adj<br>(FDR) |
|----------|-----------------------------------------------------------------------|------------------------|----------------------|
| GPAM     | Glycerol-3-Phosphate Acyltransferase, Mitochondrial                   | -1.45                  | 6.91E-10             |
| GOT2     | Glutamic-Oxaloacetic Transaminase 2                                   | -1.17                  | 4.66E-09             |
| NNT      | Nicotinamide Nucleotide Transhydrogenase                              | -1.48                  | 4.84E-08             |
| ACADM    | Acyl-CoA Dehydrogenase Medium Chain                                   | -1.34                  | 1.38E-07             |
| MTHFD1L  | Methylenetetrahydrofolate Dehydrogenase (NADP+ Dependent) 1 Like      | 3.13                   | 2.44E-06             |
| LIPT2    | Lipoyl(Octanoyl) Transferase 2                                        | -1.16                  | 3.82E-06             |
| SUCLA2   | Succinate-CoA Ligase ADP-Forming Subunit Beta                         | -1.04                  | 3.87E-06             |
| NDUFS1   | NADH:Ubiquinone Oxidoreductase Core Subunit S1                        | -1.16                  | 4.30E-06             |
| COQ7     | Coenzyme Q7, Hydroxylase                                              | -0.99                  | 4.59E-06             |
| FXN      | Frataxin                                                              | -1.00                  | 5.17E-06             |
| ACOT11   | Acyl-CoA Thioesterase 11                                              | -2.90                  | 5.23E-06             |
| ALDH6A1  | Aldehyde Dehydrogenase 6 Family Member A1                             | -1.82                  | 5.37E-06             |
| PDP2     | Pyruvate Dehydrogenase Phosphatase Catalytic Subunit 2                | -0.88                  | 8.51E-06             |
| BCKDHB   | Branched Chain Keto Acid Dehydrogenase E1 Subunit Beta                | -0.86                  | 9.69E-06             |
| PRXL2A   | Peroxiredoxin Like 2A                                                 | -0.70                  | 1.10E-05             |
| PRDX3    | Peroxiredoxin 3                                                       | -0.70                  | 1.24E-05             |
| DHTKD1   | Dehydrogenase E1 And Transketolase Domain Containing 1                | -1.21                  | 1.38E-05             |
| PDHX     | Pyruvate Dehydrogenase Complex Component X                            | -0.92                  | 1.61E-05             |
| SLC25A23 | Solute Carrier Family 25 Member 23                                    | -1.05                  | 1.78E-05             |
| DLD      | Dihydrolipoamide Dehydrogenase                                        | -0.77                  | 1.96E-05             |
| FDXR     | Ferredoxin Reductase                                                  | 1.34                   | 2.03E-05             |
| SFXN3    | Sideroflexin 3                                                        | 1.47                   | 2.32E-05             |
| ACADSB   | Acyl-CoA Dehydrogenase Short/Branched Chain                           | -1.22                  | 2.50E-05             |
| SDHC     | Succinate Dehydrogenase Complex Subunit C                             | -0.77                  | 3.71E-05             |
| RDH13    | Retinol Dehydrogenase 13                                              | -1.31                  | 4.83E-05             |
| SUCLG2   | Succinate-CoA Ligase GDP-Forming Subunit Beta                         | -0.87                  | 5.04E-05             |
| COQ10A   | Coenzyme Q10A                                                         | -0.95                  | 5.44E-05             |
| OXCT2    | 3-Oxoacid CoA-Transferase 2                                           | 5.46                   | 6.10E-05             |
| MCCC2    | Methylcrotonyl-CoA Carboxylase Subunit 2                              | -1.05                  | 6.66E-05             |
| SLC25A30 | Solute Carrier Family 25 Member 30                                    | -1.64                  | 6.92E-05             |
| MT-CO1   | Mitochondrially Encoded Cytochrome C Oxidase I                        | -1.12                  | 1.12E-04             |
| COQ8A    | Coenzyme Q8A                                                          | -1.15                  | 1.19E-04             |
| MTARC2   | Mitochondrial Amidoxime Reducing Component 2                          | -0.78                  | 1.25E-04             |
| L2HGDH   | L-2-Hydroxyglutarate Dehydrogenase                                    | -1.23                  | 1.29E-04             |
| MAOB     | Monoamine Oxidase B                                                   | -1.29                  | 1.31E-04             |
| HADH     | Hydroxyacyl-CoA Dehydrogenase                                         | -1.01                  | 1.33E-04             |
| SLC25A4  | Solute Carrier Family 25 Member 4                                     | -0.87                  | 1.54E-04             |
| CS       | Citrate Synthase                                                      | -0.90                  | 1.77E-04             |
| PCK2     | Phosphoenolpyruvate Carboxykinase 2, Mitochondrial                    | 1.75                   | 1.78E-04             |
| IBA57    | Iron-Sulfur Cluster Assembly Factor IBA57                             | -0.93                  | 1.97E-04             |
| DBT      | Dihydrolipoamide Branched Chain Transacylase E2                       | -0.97                  | 2.21E-04             |
| HCCS     | Holocytochrome C Synthase                                             | -0.83                  | 2.68E-04             |
| ALDH5A1  | Aldehyde Dehydrogenase 5 Family Member A1                             | -1.18                  | 2.95E-04             |
| ETFDH    | Electron Transfer Flavoprotein Dehydrogenase                          | -1.07                  | 3.49E-04             |
| MT-CYB   | Mitochondrially Encoded Cytochrome B                                  | -1.03                  | 3.51E-04             |
| COX10    | Cytochrome C Oxidase Assembly Factor Heme A:Farnesyltransferase COX10 | -0.95                  | 3.74E-04             |
| SLC25A38 | Solute Carrier Family 25 Member 38                                    | -0.78                  | 4.01E-04             |

|          |                                                                         |       |          |
|----------|-------------------------------------------------------------------------|-------|----------|
| CHDH     | Choline Dehydrogenase                                                   | -1.41 | 4.07E-04 |
| CKMT2    | Creatine Kinase. Mitochondrial 2                                        | -0.93 | 4.39E-04 |
| ACO2     | Aconitase 2                                                             | -0.97 | 4.47E-04 |
| ACSL6    | Acyl-CoA Synthetase Long Chain Family Member 6                          | -1.39 | 4.62E-04 |
| PDPR     | Pyruvate Dehydrogenase Phosphatase Regulatory Subunit                   | -1.20 | 4.63E-04 |
| COQ6     | Coenzyme Q6. Monooxygenase                                              | -0.81 | 4.81E-04 |
| PCBD2    | Pterin-4 Alpha-Carbinolamine Dehydratase 2                              | -0.90 | 4.89E-04 |
| FH       | Fumarate Hydratase                                                      | -0.58 | 5.16E-04 |
| PCCB     | Propionyl-CoA Carboxylase Subunit Beta                                  | -0.72 | 5.17E-04 |
| SIRT5    | Sirtuin 5                                                               | -1.08 | 5.49E-04 |
| COQ5     | Coenzyme Q5. Methyltransferase                                          | -0.84 | 5.60E-04 |
| CPT1C    | Carnitine Palmitoyltransferase 1C                                       | 1.25  | 5.92E-04 |
| MMUT     | Methylmalonyl-CoA Mutase                                                | -0.83 | 6.31E-04 |
| LIAS     | Lipoic Acid Synthetase                                                  | -0.64 | 7.87E-04 |
| ACAT1    | Acetyl-CoA Acetyltransferase 1                                          | -1.03 | 8.41E-04 |
| ACACA    | Acetyl-CoA Carboxylase Alpha                                            | -0.85 | 9.76E-04 |
| CYP11A1  | Cytochrome P450 Family 11 Subfamily A Member 1                          | 0.91  | 1.15E-03 |
| CBR3     | Carbonyl Reductase 3                                                    | 1.42  | 1.21E-03 |
| CPOX     | Coproporphyrinogen Oxidase                                              | -0.63 | 1.35E-03 |
| COQ9     | Coenzyme Q9                                                             | -0.70 | 1.37E-03 |
| SDHD     | Succinate Dehydrogenase Complex Subunit D                               | -0.61 | 1.40E-03 |
| DLAT     | Dihydrolipoamide S-Acetyltransferase                                    | -1.04 | 1.40E-03 |
| TSTD1    | Thiosulfate Sulfurtransferase Like Domain Containing 1                  | 1.61  | 1.49E-03 |
| BDH1     | 3-Hydroxybutyrate Dehydrogenase 1                                       | -1.54 | 1.51E-03 |
| GPT2     | Glutamic--Pyruvic Transaminase 2                                        | -1.73 | 1.60E-03 |
| OGDH     | Oxoglutarate Dehydrogenase                                              | -0.76 | 1.71E-03 |
| GRPEL1   | GrpE Like 1. Mitochondrial                                              | -0.60 | 1.80E-03 |
| SLC25A12 | Solute Carrier Family 25 Member 12                                      | -1.08 | 1.97E-03 |
| OXR1     | Oxidation Resistance 1                                                  | -1.18 | 1.99E-03 |
| HTD2     | Hydroxyacyl-Thioester Dehydratase Type 2                                | -1.27 | 2.16E-03 |
| PPOX     | Protoporphyrinogen Oxidase                                              | 0.48  | 2.16E-03 |
| PRELID1  | PRELI Domain Containing 1                                               | 1.31  | 2.17E-03 |
| NUBPL    | NUBP Iron-Sulfur Cluster Assembly Factor. Mitochondrial                 | -0.73 | 2.18E-03 |
| CROT     | Carnitine O-Octanoyltransferase                                         | -0.58 | 2.30E-03 |
| FECH     | Ferrochelatase                                                          | -0.71 | 2.36E-03 |
| ETFA     | Electron Transfer Flavoprotein Subunit Alpha                            | -0.59 | 2.36E-03 |
| PNPLA8   | Patatin Like Phospholipase Domain Containing 8                          | -0.56 | 2.42E-03 |
| AIFM3    | Apoptosis Inducing Factor Mitochondria Associated 3                     | 2.44  | 2.46E-03 |
|          | Hydroxyacyl-CoA Dehydrogenase Trifunctional Multienzyme Complex Subunit |       |          |
| HADHB    | Beta                                                                    | -1.08 | 2.47E-03 |
| ACSL1    | Acyl-CoA Synthetase Long Chain Family Member 1                          | -1.18 | 2.48E-03 |
| DMGDH    | Dimethylglycine Dehydrogenase                                           | -1.52 | 2.54E-03 |
| SIRT4    | Sirtuin 4                                                               | -0.96 | 2.58E-03 |
| PNPO     | Pyridoxamine 5'-Phosphate Oxidase                                       | -0.61 | 2.61E-03 |
| ACSS3    | Acyl-CoA Synthetase Short Chain Family Member 3                         | -1.09 | 2.61E-03 |
| SUOX     | Sulfite Oxidase                                                         | -0.78 | 2.62E-03 |
| MSRB3    | Methionine Sulfoxide Reductase B3                                       | -1.20 | 2.67E-03 |
| NMNAT3   | Nicotinamide Nucleotide Adenylyltransferase 3                           | -0.71 | 2.89E-03 |
| SCP2     | Sterol Carrier Protein 2                                                | -0.70 | 3.01E-03 |
| PLPBP    | Pyridoxal Phosphate Binding Protein                                     | -0.48 | 3.18E-03 |
| NAT8L    | N-Acetyltransferase 8 Like                                              | -1.03 | 3.23E-03 |
| SDHB     | Succinate Dehydrogenase Complex Iron Sulfur Subunit B                   | -0.65 | 3.40E-03 |
| TXNRD1   | Thioredoxin Reductase 1                                                 | -0.56 | 3.43E-03 |
| HSPA9    | Heat Shock Protein Family A (Hsp70) Member 9                            | -0.79 | 3.58E-03 |
| PHYH     | Phytanoyl-CoA 2-Hydroxylase                                             | -0.76 | 3.61E-03 |

|          |                                                                  |       |          |
|----------|------------------------------------------------------------------|-------|----------|
| IDI1     | Isopentenyl-Diphosphate Delta Isomerase 1                        | -0.81 | 3.96E-03 |
| SLC25A51 | Solute Carrier Family 25 Member 51                               | -0.57 | 4.55E-03 |
| AK3      | Adenylate Kinase 3                                               | -1.01 | 4.92E-03 |
| SERAC1   | Serine Active Site Containing 1                                  | -0.61 | 5.27E-03 |
| ACOT7    | Acyl-CoA Thioesterase 7                                          | 1.44  | 5.29E-03 |
| MTO1     | Mitochondrial TRNA Translation Optimization 1                    | -0.41 | 5.65E-03 |
| SLC25A5  | Solute Carrier Family 25 Member 5                                | 0.95  | 5.88E-03 |
| QDPR     | Quinoid Dihydropteridine Reductase                               | -0.64 | 5.91E-03 |
| NUDT19   | Nudix Hydrolase 19                                               | -0.88 | 6.06E-03 |
| DGUOK    | Deoxyguanosine Kinase                                            | 0.59  | 6.41E-03 |
| HOGA1    | 4-Hydroxy-2-Oxoglutarate Aldolase 1                              | 1.76  | 6.50E-03 |
| HIBADH   | 3-Hydroxyisobutyrate Dehydrogenase                               | -0.64 | 6.58E-03 |
| ACACB    | Acetyl-CoA Carboxylase Beta                                      | -1.12 | 6.68E-03 |
| PRELID3A | PRELI Domain Containing 3A                                       | 1.37  | 6.80E-03 |
| MDH2     | Malate Dehydrogenase 2                                           | -0.70 | 7.10E-03 |
| HSD17B4  | Hydroxysteroid 17-Beta Dehydrogenase 4                           | -0.56 | 7.21E-03 |
| NDUFS7   | NADH:Ubiquinone Oxidoreductase Core Subunit S7                   | -0.69 | 7.35E-03 |
| ISCA1    | Iron-Sulfur Cluster Assembly 1                                   | -0.58 | 7.43E-03 |
| CISD1    | CDGSH Iron Sulfur Domain 1                                       | -0.63 | 7.99E-03 |
| ADHFE1   | Alcohol Dehydrogenase Iron Containing 1                          | -1.12 | 8.04E-03 |
| IDH2     | Isocitrate Dehydrogenase (NADP(+)) 2                             | -0.70 | 8.04E-03 |
| LYRM4    | LYR Motif Containing 4                                           | 0.65  | 8.11E-03 |
| AGPAT4   | 1-Acylglycerol-3-Phosphate O-Acyltransferase 4                   | 1.14  | 8.30E-03 |
| KMO      | Kynurenine 3-Monooxygenase                                       | 3.81  | 8.42E-03 |
| DHRS1    | Dehydrogenase/Reductase 1                                        | 0.83  | 8.78E-03 |
| ALDH4A1  | Aldehyde Dehydrogenase 4 Family Member A1                        | -0.83 | 8.99E-03 |
| NME6     | NME/NM23 Nucleoside Diphosphate Kinase 6                         | -0.51 | 9.21E-03 |
| CYP27B1  | Cytochrome P450 Family 27 Subfamily B Member 1                   | 2.92  | 9.21E-03 |
| NUDT8    | Nudix Hydrolase 8                                                | -0.67 | 9.22E-03 |
| AKR1B10  | Aldo-Keto Reductase Family 1 Member B10                          | 1.42  | 9.32E-03 |
| BCO2     | Beta-Carotene Oxygenase 2                                        | -1.75 | 9.55E-03 |
| MTHFD2L  | Methylenetetrahydrofolate Dehydrogenase (NADP+ Dependent) 2 Like | -0.72 | 1.02E-02 |
| SLC25A37 | Solute Carrier Family 25 Member 37                               | -0.76 | 1.05E-02 |
| CYB5R3   | Cytochrome B5 Reductase 3                                        | 0.58  | 1.09E-02 |
| OSBPL1A  | Oxysterol Binding Protein Like 1A                                | -0.81 | 1.14E-02 |
| FDX1     | Ferredoxin 1                                                     | -0.54 | 1.25E-02 |
| AUH      | AU RNA Binding Methylglutaconyl-CoA Hydratase                    | -0.64 | 1.26E-02 |
| ALAS1    | 5'-Aminolevulinate Synthase 1                                    | -0.66 | 1.27E-02 |
| CRAT     | Carnitine O-Acetyltransferase                                    | -0.78 | 1.36E-02 |
| PDHB     | Pyruvate Dehydrogenase E1 Subunit Beta                           | -0.46 | 1.43E-02 |
| EPHX2    | Epoxide Hydrolase 2                                              | -0.57 | 1.43E-02 |
| SDHA     | Succinate Dehydrogenase Complex Flavoprotein Subunit A           | -0.68 | 1.43E-02 |
| SLC25A3  | Solute Carrier Family 25 Member 3                                | -0.48 | 1.48E-02 |
| GLYCK    | Glycerate Kinase                                                 | 1.06  | 1.50E-02 |
| PRDX4    | Peroxiredoxin 4                                                  | 0.80  | 1.52E-02 |
| SCO2     | Synthesis Of Cytochrome C Oxidase 2                              | 1.39  | 1.54E-02 |
| GUK1     | Guanylate Kinase 1                                               | 0.65  | 1.55E-02 |
| SUGCT    | Succinyl-CoA:Glutarate-CoA Transferase                           | -0.83 | 1.57E-02 |
| GCSH     | Glycine Cleavage System Protein H                                | -0.54 | 1.65E-02 |
| HIBCH    | 3-Hydroxyisobutyryl-CoA Hydrolase                                | -0.41 | 1.66E-02 |
| IDH3A    | Isocitrate Dehydrogenase (NAD(+)) 3 Catalytic Subunit Alpha      | -0.61 | 1.67E-02 |
| PDK2     | Pyruvate Dehydrogenase Kinase 2                                  | -0.88 | 1.74E-02 |
| ACAD8    | Acyl-CoA Dehydrogenase Family Member 8                           | -0.53 | 1.85E-02 |
| CYCS     | Cytochrome C. Somatic                                            | -0.70 | 1.90E-02 |

|          |                                                                    |       |          |
|----------|--------------------------------------------------------------------|-------|----------|
| MGST3    | Microsomal Glutathione S-Transferase 3                             | -0.69 | 1.92E-02 |
| MPC2     | Mitochondrial Pyruvate Carrier 2                                   | -0.69 | 1.94E-02 |
| NME4     | NME/NM23 Nucleoside Diphosphate Kinase 4                           | -0.63 | 1.94E-02 |
| NEU4     | Neuraminidase 4                                                    | 2.21  | 2.04E-02 |
| NDUFS8   | NADH:Ubiquinone Oxidoreductase Core Subunit S8                     | -0.62 | 2.07E-02 |
| COX11    | Cytochrome C Oxidase Copper Chaperone COX11                        | -0.67 | 2.20E-02 |
| ABCB7    | ATP Binding Cassette Subfamily B Member 7                          | -0.51 | 2.23E-02 |
| CBR4     | Carbonyl Reductase 4                                               | -0.56 | 2.29E-02 |
| ACADVL   | Acyl-CoA Dehydrogenase Very Long Chain                             | -0.88 | 2.40E-02 |
| BCKDHA   | Branched Chain Keto Acid Dehydrogenase E1 Subunit Alpha            | -0.74 | 2.42E-02 |
| CHCHD7   | Coiled-Coil-Helix-Coiled-Coil-Helix Domain Containing 7            | -0.44 | 2.43E-02 |
| SUCLG1   | Succinate-CoA Ligase GDP/ADP-Forming Subunit Alpha                 | -0.51 | 2.45E-02 |
| PDSS2    | Decaprenyl Diphosphate Synthase Subunit 2                          | -0.41 | 2.47E-02 |
| PDK1     | Pyruvate Dehydrogenase Kinase 1                                    | -0.65 | 2.48E-02 |
| DHODH    | Dihydroorotate Dehydrogenase (Quinone)                             | -0.61 | 2.72E-02 |
| ZADH2    | Prostaglandin Reductase 3                                          | -0.47 | 2.81E-02 |
| NADK2    | NAD Kinase 2. Mitochondrial                                        | -0.74 | 2.81E-02 |
| CYC1     | Cytochrome C1                                                      | -0.55 | 2.86E-02 |
| IDH3B    | Isocitrate Dehydrogenase (NAD(+)) 3 Non-Catalytic Subunit Beta     | -0.44 | 3.05E-02 |
| CA5B     | Carbonic Anhydrase 5B                                              | 0.90  | 3.05E-02 |
| FAHD1    | Fumarylacetoacetate Hydrolase Domain Containing 1                  | -0.54 | 3.09E-02 |
| SLC25A11 | Solute Carrier Family 25 Member 11                                 | -0.51 | 3.18E-02 |
| ABHD10   | Abhydrolase Domain Containing 10. Depalmitoylase                   | -0.44 | 3.31E-02 |
| TMLHE    | Trimethyllysine Hydroxylase. Epsilon                               | -0.71 | 3.51E-02 |
| DLST     | Dihydrolipoamide S-Succinyltransferase                             | -0.63 | 3.51E-02 |
| NDUFV2   | NADH:Ubiquinone Oxidoreductase Core Subunit V2                     | -0.44 | 3.58E-02 |
| MLYCD    | Malonyl-CoA Decarboxylase                                          | -1.03 | 3.69E-02 |
| CPT1B    | Carnitine Palmitoyltransferase 1B                                  | -1.02 | 3.71E-02 |
| SIRT3    | Sirtuin 3                                                          | -0.58 | 3.81E-02 |
| IVD      | Isovaleryl-CoA Dehydrogenase                                       | -0.57 | 3.90E-02 |
| UQCRCF1  | Ubiquinol-Cytochrome C Reductase. Rieske Iron-Sulfur Polypeptide 1 | -0.42 | 3.93E-02 |
| ALDH2    | Aldehyde Dehydrogenase 2 Family Member                             | -0.80 | 4.00E-02 |
| MGST1    | Microsomal Glutathione S-Transferase 1                             | 1.18  | 4.07E-02 |
| NDUFC2   | NADH:Ubiquinone Oxidoreductase Subunit C2                          | -0.35 | 4.07E-02 |
| MRPS36   | Mitochondrial Ribosomal Protein S36                                | -0.46 | 4.19E-02 |
| HMGCL    | 3-Hydroxy-3-Methylglutaryl-CoA Lyase                               | -0.55 | 4.36E-02 |
| SLC25A6  | Solute Carrier Family 25 Member 6                                  | 0.67  | 4.49E-02 |
| ALDH1L1  | Aldehyde Dehydrogenase 1 Family Member L1                          | -0.88 | 4.64E-02 |
| SLC25A42 | Solute Carrier Family 25 Member 42                                 | -0.70 | 4.70E-02 |
| ECI1     | Enoyl-CoA Delta Isomerase 1                                        | -0.65 | 4.72E-02 |
| STARD7   | StAR Related Lipid Transfer Domain Containing 7                    | -0.55 | 4.81E-02 |
| NT5M     | 5'-Nucleotidase. Mitochondrial                                     | -0.51 | 4.87E-02 |

**Table S3.** Metabolic Mitopathways with the number of differentially expressed genes (DEGs) involved (from inclusion body myositis (IBM) muscle RNA seq).

|                            | n° DEGs / n°<br>total genes per<br>pathway | Downregulated<br>genes in the<br>pathway | Upregulated<br>genes in the<br>pathway | % DEGs /<br>total genes<br>per<br>pathway | Interactions (n°<br>DEGs in >1<br>pathway/n°<br>DEGs per<br>pathway) |
|----------------------------|--------------------------------------------|------------------------------------------|----------------------------------------|-------------------------------------------|----------------------------------------------------------------------|
| Carbohydrate<br>metabolism | 42/74                                      | 38                                       | 4                                      | 56.8                                      | 17/42                                                                |
| Metals and<br>cofactors    | 65/123                                     | 57                                       | 8                                      | 52.8                                      | 20/65                                                                |
| Vitamin metabolism         | 22/49                                      | 17                                       | 5                                      | 44.9                                      | 14/22                                                                |
| Electron carriers          | 7/16                                       | 7                                        | 0                                      | 43.8                                      | 7/7                                                                  |
| Amino acid<br>metabolism   | 37/90                                      | 33                                       | 4                                      | 41.1                                      | 19/37                                                                |
| Lipid metabolism           | 48/123                                     | 39                                       | 9                                      | 39.0                                      | 19/48                                                                |
| Nucleotide<br>metabolism   | 15/41                                      | 11                                       | 4                                      | 36.6                                      | 4/15                                                                 |
| Sulfur metabolism          | 4/11                                       | 3                                        | 1                                      | 36.4                                      | 2/4                                                                  |
| Detoxification             | 15/51                                      | 10                                       | 5                                      | 29.4                                      | 5/15                                                                 |

**Table S4.** Metaboanalyst analysis combining metabolic differentially expressed genes (DEGs) in muscle RNA-seq with organic acids and nucleotides in urine. Significant pathways from pathway analysis and network enrichment analysis represented in the table.

| <b>Pathway analysis<br/>DEGs + organic acids</b>                     | <b>Total genes<br/>in pathway</b> | <b>Hits<br/>matched</b> | <b>FDR</b> |
|----------------------------------------------------------------------|-----------------------------------|-------------------------|------------|
| Citrate cycle (TCA cycle)                                            | 42                                | 24                      | 1.96E-19   |
| Valine, leucine and isoleucine degradation                           | 88                                | 23                      | 7.73E-10   |
| Propanoate metabolism                                                | 48                                | 17                      | 1.39E-09   |
| Pyruvate metabolism                                                  | 45                                | 12                      | 3.01E-05   |
| Butanoate metabolism                                                 | 29                                | 9                       | 1.37E-04   |
| Glyoxylate and dicarboxylate metabolism                              | 56                                | 11                      | 1.29E-03   |
| Synthesis and degradation of ketone bodies                           | 10                                | 4                       | 1.34E-02   |
| Alanine, aspartate and glutamate metabolism                          | 61                                | 9                       | 3.64E-02   |
| Nicotinate and nicotinamide metabolism                               | 42                                | 7                       | 4.49E-02   |
| Fatty acid degradation                                               | 102                               | 12                      | 4.49E-02   |
| <b>Network enrichment analysis pathways<br/>DEGs + organic acids</b> |                                   |                         |            |
| Citrate cycle (TCA cycle)                                            | 78                                | 6                       | 3.63E-06   |
| Alanine, aspartate and glutamate metabolism                          | 98                                | 4                       | 7.90E-03   |
| <b>Pathways analysis<br/>DEGs+ nucleotides</b>                       |                                   |                         |            |
| Citrate cycle (TCA cycle)                                            | 42                                | 20                      | 2.04E-13   |
| Propanoate metabolism                                                | 48                                | 16                      | 5.31E-08   |
| Valine, leucine and isoleucine degradation                           | 88                                | 21                      | 7.87E-08   |
| Pyruvate metabolism                                                  | 45                                | 10                      | 2.15E-03   |
| Glyoxylate and dicarboxylate metabolism                              | 56                                | 10                      | 9.72E-03   |
| Butanoate metabolism                                                 | 29                                | 7                       | 9.72E-03   |
| Synthesis and degradation of ketone bodies                           | 10                                | 4                       | 1.65E-02   |
| <b>Network enrichment analysis pathways<br/>DEGs + nucleotides</b>   |                                   |                         |            |
| Purine metabolism                                                    | 274                               | 11                      | 1.86E-07   |
| Pyrimidine metabolism                                                | 139                               | 7                       | 4.90E-05   |
